# Supplementary material for: Carbon black nanoparticle trapping: a strategy to realize the true energy storage potential of redox-active conjugated microporous polymers
Source: Royal Society of Chemistry journal article supplement (doi:10.1039/d1ta04782e), 2021-01-01
Supplement: d1ta04782e1.pdf [file d1ta04782e1.pdf]

*Electronic Supplementary Information for*

**Carbon black nanoparticle trapping: A strategy to realize the true energy storage potential  
of redox-active conjugated microporous polymers**

*Chang Wan Kang,<sup>a</sup> Yoon-Joo Ko,<sup>b</sup> Sang Moon Lee,<sup>c</sup> Hae Jin Kim,<sup>c</sup> Jaewon Choi,<sup>\*d</sup> and Seung Uk Son<sup>\*a</sup>*

<sup>a</sup> Department of Chemistry, Sungkyunkwan University, Suwon 16419, Korea

E-mail: sson@skku.edu

<sup>b</sup> Laboratory of Nuclear Magnetic Resonance, National Center of Inter-University Research Facilities (NCIRF), Seoul

National University, Seoul 08826, Korea

<sup>c</sup> Korea Basic Science Institute, Daejeon 34133, Korea

<sup>d</sup> Department of Chemistry and Research Institute of Natural Science,

Gyeongsang National University, Jinju 52828, Korea

E-mail: cjlw0910@gnu.ac.kr

**Fig. S1.** SEM images of CB, CB@CMP-DMBs, CMP-DMB, CB-O, CB@CMP-BQs, and CMP-BQ.



**Fig. S2.** TEM images of CB@CMP-DMB1, CB@CMP-DMB2, CB@CMP-BQ1, and CB@CMP-BQ2, compared with those of CB, CB@CMP-DMB3, CMP-DMB, CB-O, CB@CMP-BQ3, and CMP-BQ.



**Fig. S3.** TEM images of a mixture of CMP-DMB and CB@CMP-DMB that prepared by the Sonogashira coupling of 1,3,5-triethynylbenzene (0.13 mmol) and 1,4-diiodo-2,5-dimethoxybenzene (0.20 mmol) in the presence of CB (12.5 mg).



**Fig. S4.** N<sub>2</sub> adsorption-desorption isotherm curves (obtained at 77K) and pore size distribution diagrams (based on the DFT method) of CB@CMP-DMB1, CB@CMP-DMB2, CB@CMP-BQ1, and CB@CMP-BQ2.



Fig. S5. IR spectra of CB@CMP-DMB1, CB@CMP-DMB2, CB@CMP-BQ1, and CB@CMP-BQ2.



**Fig. S6.** Solid state  $^{13}\text{C}$  NMR spectra of CB@CMP-DMB1, CB@CMP-DMB2, CB@CMP-BQ1, and CB@CMP-BQ2.



Fig. S7. PXRD patterns of CB@CMP-DMBs, CB@CMP-BQs, CMP-DMB, CMP-BQ, CB, and CB-O.



**Fig. S8.** TGA curves of CB@CMP-DMBs, CB@CMP-BQs, CMP-DMB, and CMP-BQ.



**Fig. S9.** (a) Cyclic voltammograms and (b) charge-discharge profiles of CB@CMP-BQ1 and CB@CMP-BQ2.



**Fig. S10.** Scan rate-dependent cyclic voltammograms of CB@CMP-BQ1, CB@CMP-BQ2, CB@CMP-BQ3, CB-O, and CMP-BQ.



**Fig. S11.** Current density-dependent charge-discharge profiles of CB@CMP-BQ1, CB@CMP-BQ2, CB@CMP-BQ3, CB-O, and CMP-BQ.



**Fig. S12.** (a) An equivalent circuit model used for the analysis of EIS results, (b) the fitted Nyquist plots, (c) equivalent circuit parameters of CB-O, CB@CMP-BQs, and CMP-BQ.



(c)

| Materials                       | $R^2$  | $R_s$ ( $\Omega$ ) | $R_{ct}$ ( $\Omega$ ) | $C_{EDL}$ ( $\mu F$ ) | $C_P$ (mF) |
|---------------------------------|--------|--------------------|-----------------------|-----------------------|------------|
| CB-O                            | 0.9976 | 0.110              | 0.324                 | 4.103                 | 0.016      |
| CB@CMP-BQ1                      | 0.9997 | 0.333              | 0.911                 | 4.440                 | 2.980      |
| CB@CMP-BQ2                      | 0.9998 | 0.795              | 1.255                 | 4.179                 | 5.404      |
| CB@CMP-BQ3                      | 0.9988 | 0.976              | 3.210                 | 4.915                 | 6.036      |
| CB@CMP-BQ3 (After 10000 cycles) | 0.9987 | 1.181              | 3.898                 | 11.103                | 5.967      |
| CMP-BQ                          | 0.9977 | 3.938              | 12.338                | 6.579                 | 0.458      |

**Fig. S13.** (a) Photographs of pellets and (b) conductivity measurements of CB-O, CB@CMP-BQs, and CMP-BQ.



**(b)**

| Materials                         | CMP-BQ | CB@CMP-BQ3 | CB@CMP-BQ2 | CB@CMP-BQ1 | CB-O |
|-----------------------------------|--------|------------|------------|------------|------|
| Average Sheet Resistance (Ohm/sq) | null   | 25.27      | 15.20      | 9.22       | 6.41 |
| Thickness (mm)                    | 0.20   | 0.21       | 0.22       | 0.20       | 0.20 |
| Conductivity (S/m)                | null   | 190        | 300        | 540        | 780  |

Fig. S14. IR spectra of CB@CMP-BQ3 before and after 10000 cycles.



**Table S1.** Porous parameters of CB, CB-O, CMP-DMB, CMP-BQ, CB@CMP-DMBs, and CB@CMP-BQs.

| Entry | Materials   | $S_{\text{BET}}^{\text{a}}$<br>( $\text{m}^2/\text{g}$ ) | $V_{\text{mic}}^{\text{b}}$<br>( $\text{cm}^3/\text{g}$ ) |
|-------|-------------|----------------------------------------------------------|-----------------------------------------------------------|
| 1     | CB          | 68                                                       | 0.00                                                      |
| 2     | CB@CMP-DMB1 | 363                                                      | 0.07                                                      |
| 3     | CB@CMP-DMB2 | 452                                                      | 0.13                                                      |
| 4     | CB@CMP-DMB3 | 524                                                      | 0.15                                                      |
| 5     | CMP-DMB     | 609                                                      | 0.16                                                      |
| 6     | CB-O        | 78                                                       | 0.00                                                      |
| 7     | CB@CMP-BQ1  | 173                                                      | 0.02                                                      |
| 8     | CB@CMP-BQ2  | 229                                                      | 0.02                                                      |
| 9     | CB@CMP-BQ3  | 301                                                      | 0.07                                                      |
| 10    | CMP-BQ      | 313                                                      | 0.07                                                      |

<sup>a</sup> Surface areas based on BET theory. <sup>b</sup> Micropore volumes based on t-plot.

**Table S2.** Electrochemical performance of the recent CMP-based electrode materials for supercapacitors.

| Entry | Materials            | Type of Materials | Specific Capacitances (F/g) |      |     |       |       |     |     | Measurement Type | Ref       |
|-------|----------------------|-------------------|-----------------------------|------|-----|-------|-------|-----|-----|------------------|-----------|
|       |                      |                   | Current Density (A/g)       |      |     |       |       |     |     |                  |           |
|       |                      |                   | 0.1                         | 0.2  | 0.5 | 1     | 2     | 5   | 10  |                  |           |
| 1     | Aza-CMP@350          | CMP               |                             |      |     | 461   |       | 397 | 378 | three electrode  | 1         |
| 2     | CMP                  | CMP               |                             |      |     |       |       | 142 |     | three electrode  | 2         |
| 3     | aG-PTEPE-TBPE-C      | CMP/C composite   |                             | 179  |     |       |       |     |     | three electrode  | 3         |
| 4     | TpDAB                | CMP               |                             |      |     | 400   |       |     |     | three electrode  | 4         |
| 5     | N3-CMP-1             | Carbonization     | 175                         |      |     | 164   |       |     | 149 | three electrode  | 5         |
| 6     | G-TEPA-TPA-C         | Carbonization     |                             | 268  |     |       |       |     |     | two electrode    | 6         |
| 7     | NPCM-1               | Carbonization     | 264                         |      |     |       |       |     |     | two electrode    | 7         |
| 8     | TAT-CMP-2            | CMP               |                             |      |     | 183   | 173   | 158 | 137 | three electrode  | 8         |
| 9     | Fc-GMP               | CMP/C composite   |                             |      | 231 |       |       |     | 134 | two electrode    | 9         |
| 10    | H-CMP-BPPB           | CMP               |                             |      | 220 | 193   |       |     | 120 | two electrode    | 10        |
| 11    | PAQTA                | CMP               |                             |      |     | 168   |       |     |     | two electrode    | 11        |
| 12    | H-NCB-900            | Carbonization     |                             |      |     | 286   |       |     | 224 | two electrode    | 12        |
| 13    | POP <sub>M-TFP</sub> | POP               |                             |      | 178 | 137.4 | 130.5 |     |     | three electrode  | 13        |
|       | POP <sub>M-TFP</sub> | POP               |                             | 91.7 |     |       |       |     |     | two electrode    |           |
| 14    | N-CMP-BZ             | CMP               |                             |      |     | 189   |       |     | 138 | two electrode    | 14        |
| 15    | GT-POP-1             | CMP               |                             |      | 324 |       |       |     |     | two electrode    | 15        |
| 16    | CB@CMP-BQ3           | CMP/C composite   |                             | 424  | 373 |       |       |     | 280 | two electrode    | This work |

S1 Y. Kou, Y. Xu, Z. Guo and D. Jiang, *Angew. Chem. Int. Ed.* 2011, **50**, 8753-8757.

S2 H. Zhang, Y. Zhang, C. Gu and Y. Ma, *Adv. Energy Mater.* 2015, **5**, 1402175.

S3 K. Yuan, P. Guo-Wang, T. Hu, L. Shi, R. Zeng, M. Forster, T. Pichler, Y. Chen and U. Scherf, *Chem. Mater.* 2015, **27**, 7403-7411.

S4 B. C. Patra, S. Khilari, L. Satyanarayana, D. Pradhan and A. Bhaumik, *Chem. Commun.* 2016, **52**, 7592-7595.

S5 J. -S. M. Lee, T. -H. Wu, B. M. Alston, M. E. Briggs, T. Hasell, C. C. Hu and A. I. Cooper, *J. Mater. Chem. A* 2016, **4**, 7665-7673.

S6 K. Yuan, T. Hu, Y. Xu, R. Graf, G. Brunklaus, M. Forster, Y. Chen and U. Scherf, *ChemElectroChem* 2016, **3**, 822-828.

S7 Y. Xu, S. Wu, S. Ren, J. Ji, Y. Yue and J. Shen, *RSC Adv.* 2017, **7**, 32496-32501.

S8 X. -C. Li, Y. Zhang, C. -Y. Wang, Y. Wan, W. -Y. Lai, H. Pang and W. Huang, *Chem. Sci.* 2017, **8**, 2959-2965.

S9 A. M. Khattak, H. Sin, Z. A. Ghazi, X. He, B. Liang, N. A. Khan, H. R. Alanagh, A. Iqbal, L. Li and Z. Tang, *J. Mater. Chem. A* 2018, **6**, 18827-18832.

S10 J. Choi, J. H. Ko, C. W. Kang, S. M. Lee, H. J. Kim, Y. -J. Ko, M. Yang and S. U. Son, *J. Mater. Chem.* 2018, **6**, 6233-6237.

S11 Y. Liao, H. Wang, M. Zhu and A. Thomas, *Adv. Mater.* 2018, **30**, 1705710.

S12 J. Lee, J. Choi, D. Kang, Y. Myung, S. M. Lee, H. J. Kim, Y. -J. Ko, S. -K. Kim and S. U. Son, *ACS Sustainable Chem. Eng* 2018, **6**, 3525-3532.

S13 L. Xu, R. Liu, F. Wang, S. Yan, X. Shi and J. Yang, *RSC Adv.* 2019, **9**, 1586-1590.

S14 S. Y. Park, C. W. Kang, S. M. Lee, H. J. Kim, Y. -J. Ko, J. Choi and S. U. Son, *Chem. Eur. J.* 2020, **26**, 12343-12348.

S15 H. Zhang, X. Tang and C. Gu, *J. Mater. Chem. A* 2021, **9**, 4984-4989.
